# The American Journal of Psychiatry

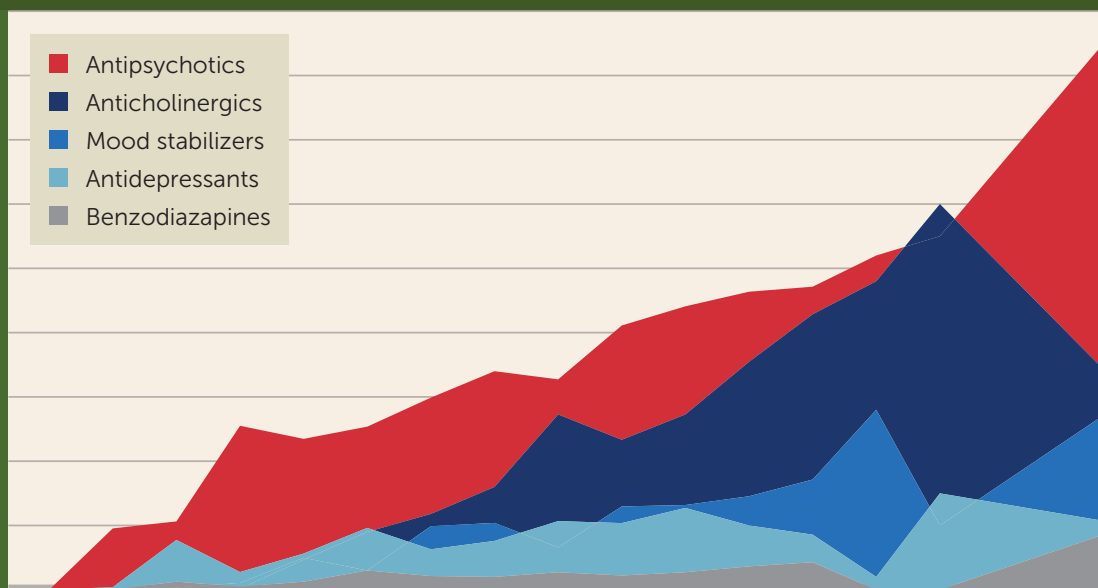

Anticholinergic Medication Burden–Associated  
Cognitive Impairment in Schizophrenia

Disparities in Screening and Treatment of Cardiovascular  
Diseases in Patients With Mental Disorders Across the World

Office-Based Methadone Treatment for Opioid Use  
Disorder and Pharmacy Dispensing

Efficacy of Combining Varenicline and Naltrexone for  
Smoking Cessation and Drinking Reduction
