# Go Online

Visit [ajp.psychiatryonline.org](http://ajp.psychiatryonline.org) for these features!

## AJP in Advance *Discover the latest research advances before they appear in print*

### **Sleep Abnormalities in Schizophrenia: State of the Art and Next Steps**

A review of the evidence of the presence of sleep disturbances in schizophrenia shows how sleep alterations are associated with the clinical and cognitive dysfunctions of schizophrenia patients, and how treating sleep abnormalities may ameliorate the symptoms and improve the quality of life of these patients.

### **Item-Level Genome-Wide Association Study of the Alcohol Use Disorders Identification Test in Three Population-Based Cohorts**

An examination of genetic data from more than 150,000 people concerning particular clinical aspects of alcohol use disorders found that some questionnaire items from a widely used alcohol use disorder screening tool possess stronger genetic information than other questionnaire items, moving genetic research one step closer to clinical utility for alcohol use disorders.

## AJP CME *Earn CME credit: 3 courses per issue*

You can earn CME credits by reading articles in *The American Journal of Psychiatry*. Three articles in this issue form a short course that consists of reading the article and answering three multiple-choice questions with a single correct answer for up to 1 *AMA PRA Category 1 Credit*<sup>™</sup> each. Credit is issued only to subscribers of the online AJP CME Course Program.

See the table below for the articles in this month's issue that are the subject of a CME quiz.

### **In this issue**

---

Efficacy of Combining Varenicline and Naltrexone for Smoking Cessation and Drinking Reduction: A Randomized Clinical Trial (p. 818)

---

Anticholinergic Medication Burden—Associated Cognitive Impairment in Schizophrenia (p. 838)

---

Time Course of Relapse Following Acute Treatment for Anorexia Nervosa (p. 848)

---

## History of Psychiatry *Revisit the field's rich history through the AJP Archive*

### **75 years ago this month: Psychiatry in Industry**

Frederick W. Dershimer, M.D., discusses the first two years of a psychiatry program set up within the Du Pont Company, finding industrial management open-minded about the application of psychiatry in industry provided psychiatrists are willing to learn about industry and its problems rather than being "long-haired, impractical theorists who, without ever spending the time to learn the facts, attempt to tell industry how to run its own business."

@APAPubJournals

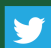

Psychiatry Online

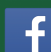

AMERICAN  
PSYCHIATRIC  
ASSOCIATION  
PUBLISHING

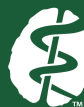

[www.appi.org](http://www.appi.org)  
1-800-368-5777  
[appi@psych.org](mailto:appi@psych.org)
